# Supplementary material for: Size-tunable tavorite LiFe(PO4)(OH) microspheres with a core–shell structure
Source: Royal Society of Chemistry journal article supplement (doi:10.1039/c5ce00431d), 2015-01-01
Supplement: c5ce00431d1.pdf [file c5ce00431d1.pdf]

## **Electronic Supplementary Information (ESI)**

### **Size-tunable tavorite $\text{LiFe}(\text{PO}_4)(\text{OH})$ microspheres with a core-shell structure**

Min-Young Cho,<sup>a,c</sup> Young Soo Lim,<sup>b</sup> Sun-Min Park,<sup>a</sup> Kwang-Bum Kim,<sup>c</sup> and Kwang Chul Roh <sup>\*a</sup>

<sup>a</sup> Energy Efficient Materials Team, Energy & Environmental Division, Korea Institute of Ceramic Engineering & Technology, 101, Soho-ro, Jinju-si, Gyeongsangnam-do 660-031, Republic of Korea.

<sup>b</sup> Energy Conversion Materials Team, Energy & Environmental Division, Korea Institute of Ceramic Engineering & Technology, 101, Soho-ro, Jinju-si, Gyeongsangnam-do 660-031, Republic of Korea.

<sup>c</sup> Department of Materials Science & Engineering, Yonsei University, 50 Yonsei-ro, Seodaemun-gu, Seoul 120-749, Republic of Korea.

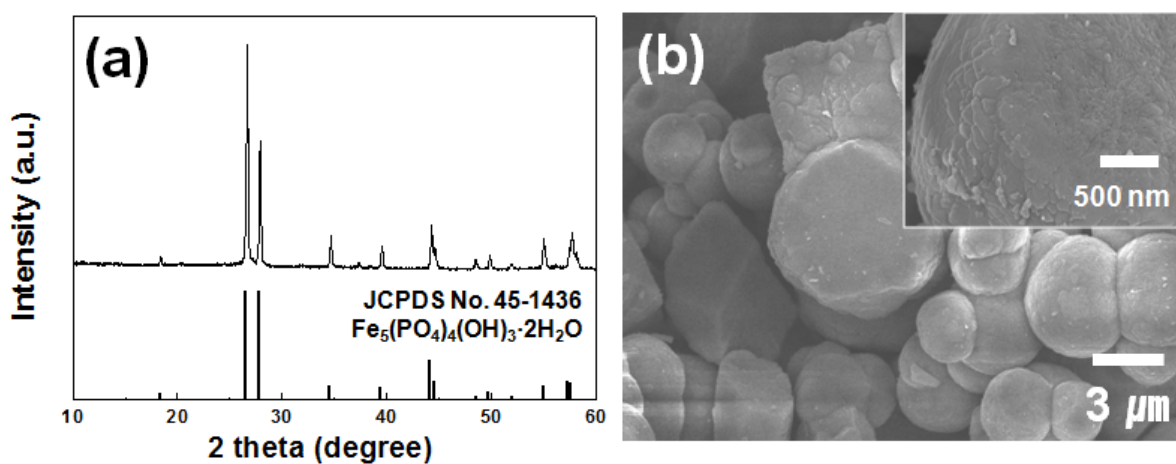

**Fig. S1** (a) XRD pattern and (b) FE-SEM image of a sample by a hydrothermal process (distilled water was used as the reaction medium, but all other conditions of reaction were the same as the solvothermal process)

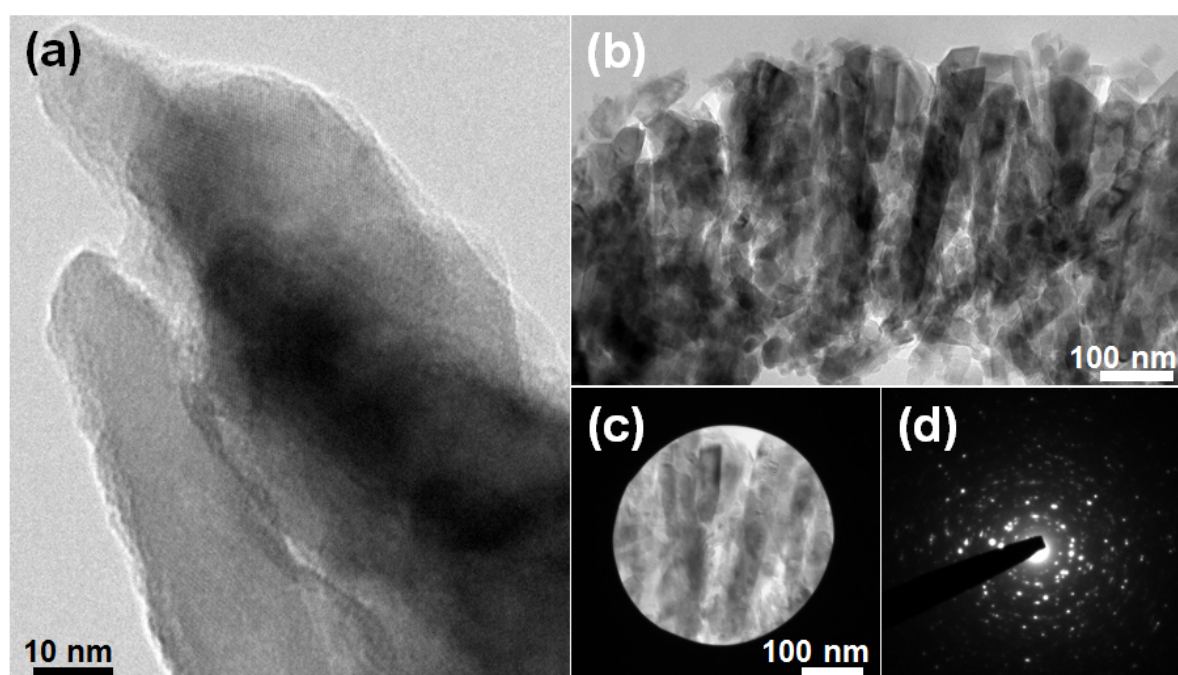

**Fig. S2** (a) High magnification image of the shell region of C3-LFP(OH) shown in (b). (d) Selected-area electron diffraction (SAED) pattern of the region shown in (c).

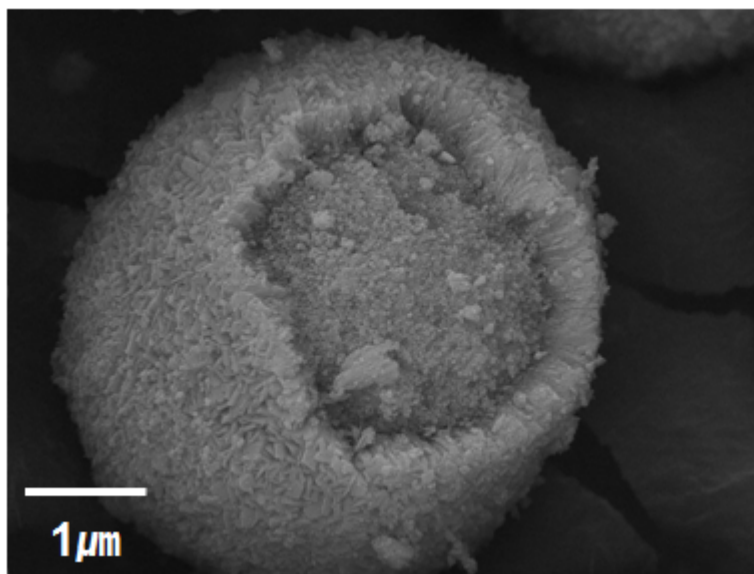

Fig. S3 FE-SEM image of a cracked C3-LFP(OH) particle after being reacted at 160 °C for 48 h.

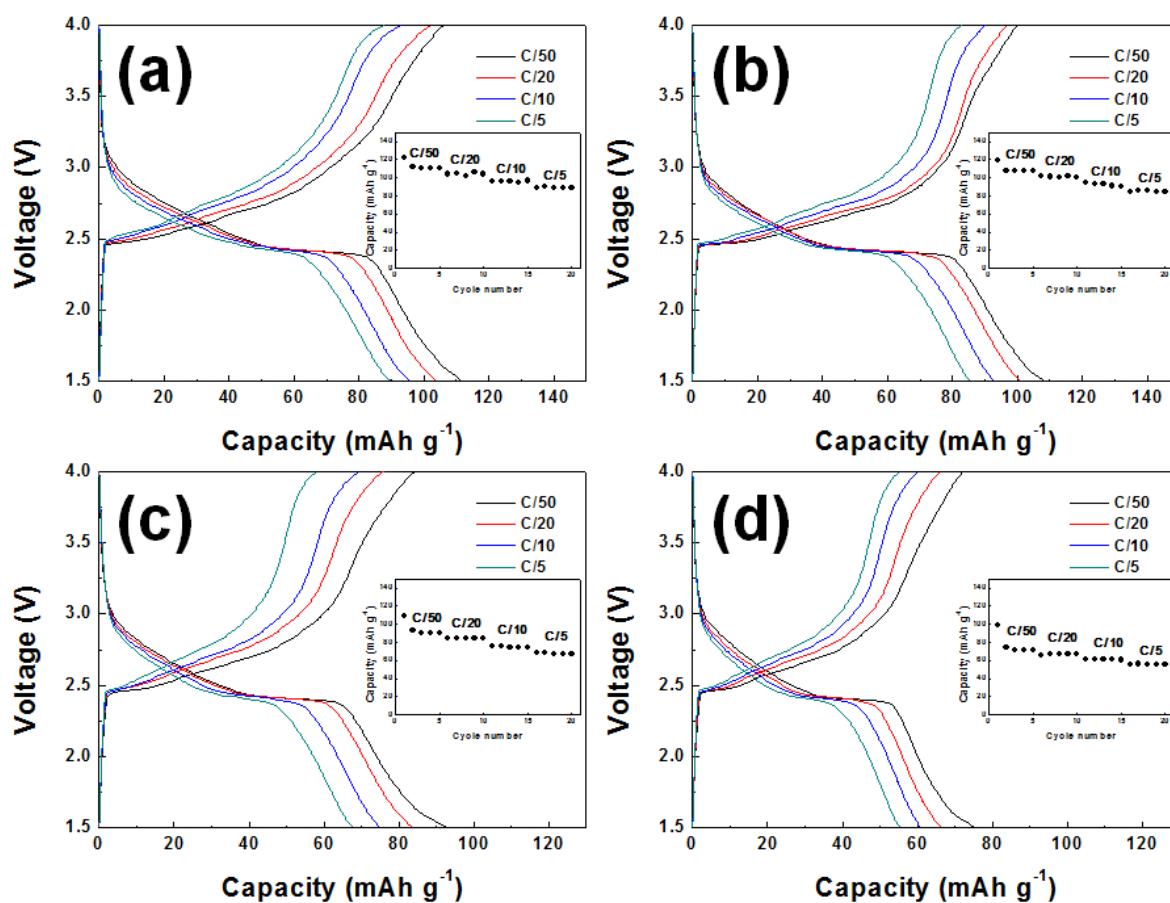

Fig. S4 (a) Charge/discharge curves for (a) C0-LFP(OH), (b) C1-LFP(OH), (c) C2-LFP(OH), and (d) C3-LFP(OH) in the ranges 3.0–4.35 V vs. Li/ Li<sup>+</sup> at various C-rates.
